# Supplementary material
Source: PubMed Central journal article supplement (PMC4652183)
Supplement: Supp_Figure1.pdf [file Supp_Figure1.pdf]

## Supplementary Data

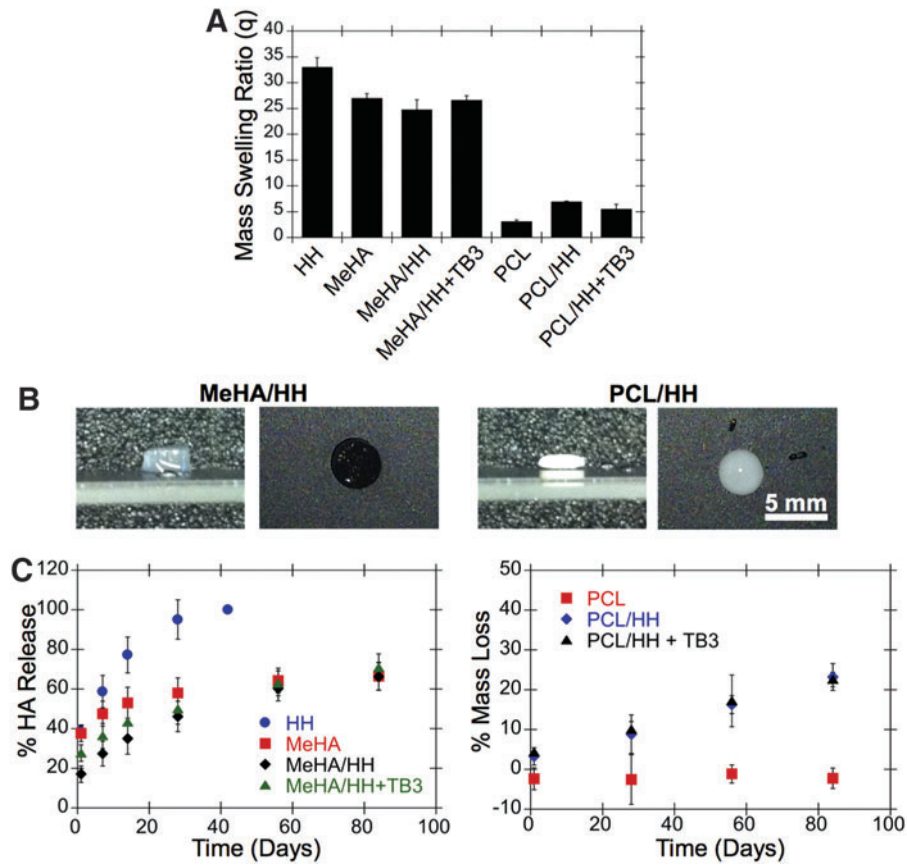

**SUPPLEMENTARY FIG. S1.** Characterization of fibrous scaffolds. (A) Mass swelling ratio of fibrous scaffolds ( $n=4$ ). (B) Images of swollen fibrous scaffolds (swollen in PBS at 37°C). (C) Degradation profiles (i.e., *left*: uronic acid release for HA-containing scaffolds and *right*: mass loss for PCL-containing scaffolds) for fibrous scaffolds incubated in PBS at 37°C ( $n=4$ ). HA, hyaluronic acid; PBS, phosphate-buffered saline.
