# Supplementary material
Source: PubMed Central journal article supplement (PMC4652183)
Supplement: Supp_Figure2.pdf [file Supp_Figure2.pdf]

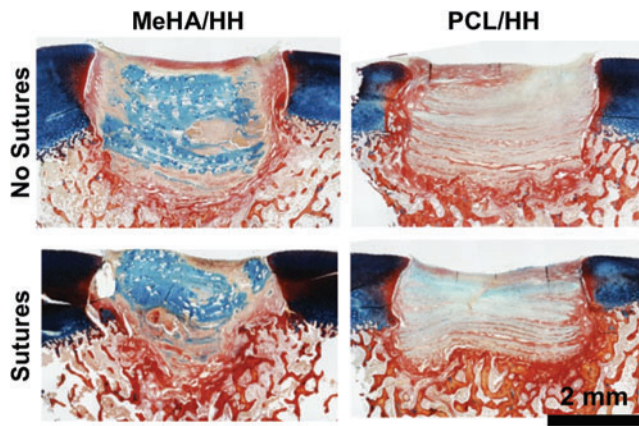

**SUPPLEMENTARY FIG. S2.** Histology (i.e., alcian blue and picosirius red staining) of scaffolds implanted in cartilage defects with and without sutures after 2 weeks *in vivo* ( $n=4$ ).
