# Supplementary material
Source: PubMed Central journal article supplement (PMC4652183)
Supplement: Supp_Figure3.pdf [file Supp_Figure3.pdf]

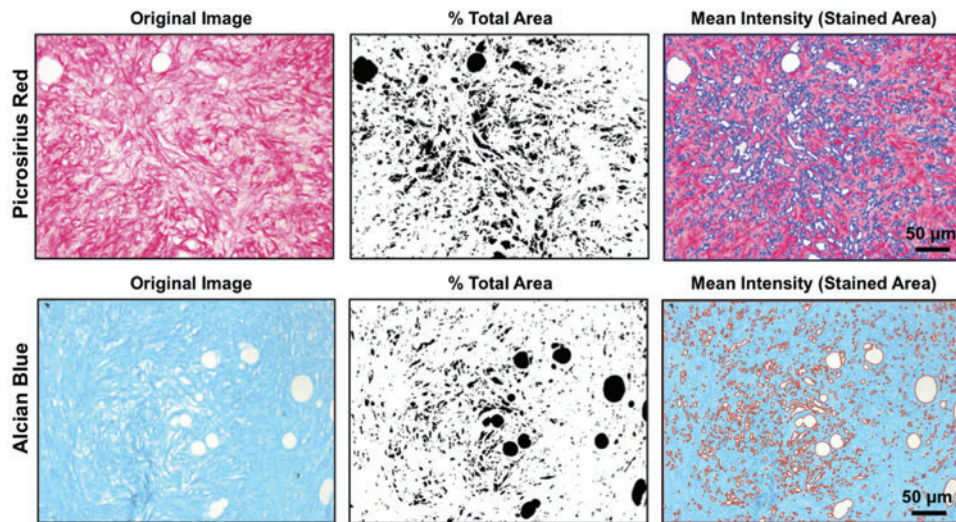

**SUPPLEMENTARY FIG. S3.** Quantification of staining. Representative images of picrosirius red and alcian blue staining, depicting thresholding and masking steps using a custom CellProfiler script for quantification of percent positive stained area and staining intensity.
