# Supplementary material
Source: PubMed Central journal article supplement (PMC4652183)
Supplement: Supp_Figure4.pdf [file Supp_Figure4.pdf]

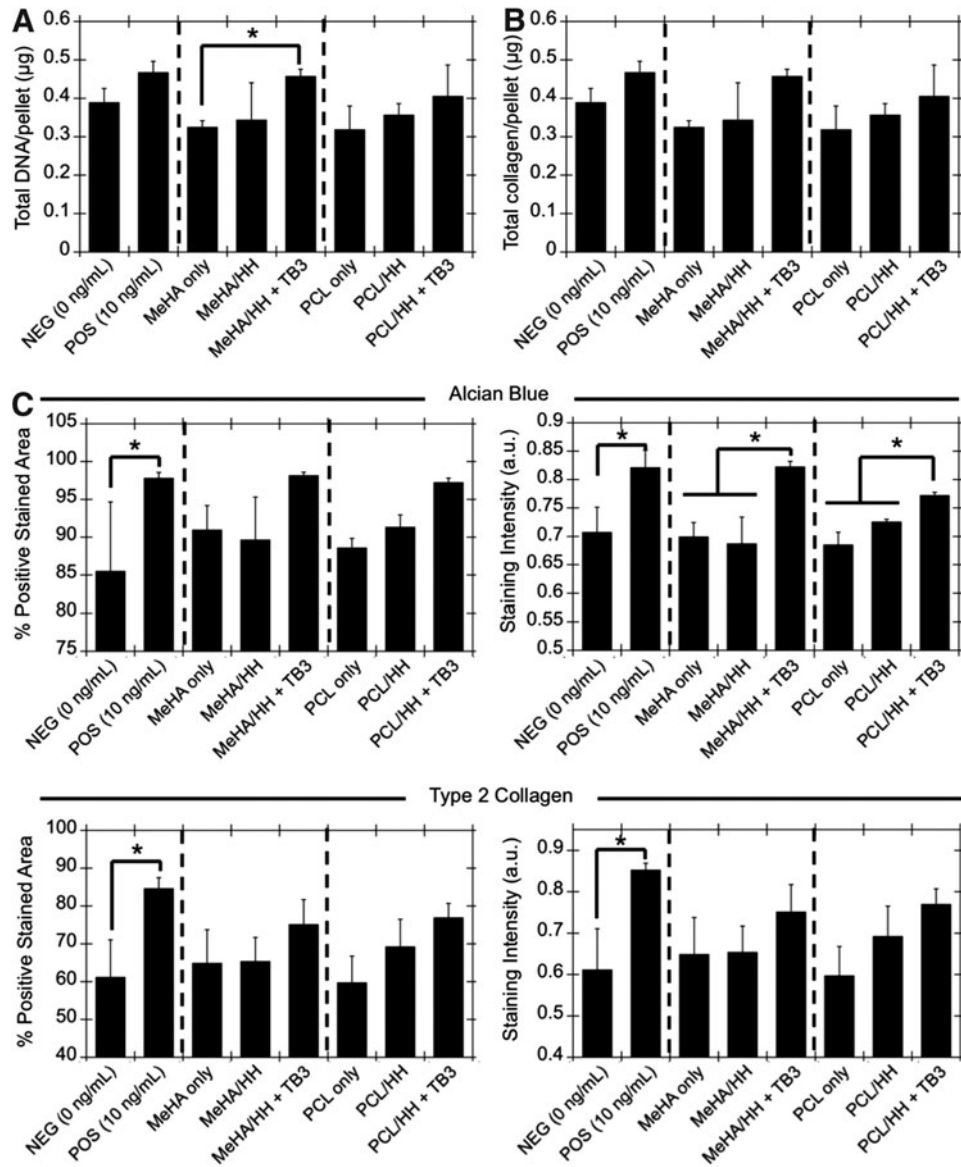

**SUPPLEMENTARY FIG. S4.** Activity of TGF $\beta$ 3 assessed through chondrogenesis of MSC pellets cultured in the same wells as scaffolds releasing TGF $\beta$ 3. (**A**, **B**) Biochemical analysis (i.e., total DNA and collagen, respectively) of MSC pellets ( $n=4$ ). (**C**) Quantification of histology (i.e., alcian blue staining and IHC for type 2 collagen) of MSC pellets ( $n=4$ ). IHC, immunohistochemistry; MSC, mesenchymal stem cell; TGF $\beta$ 3, transforming growth factor- $\beta$ . \* $p < 0.05$  between specified groups.
