# Supplementary material
Source: PubMed Central journal article supplement (PMC4652183)
Supplement: Supp_Figure6.pdf [file Supp_Figure6.pdf]

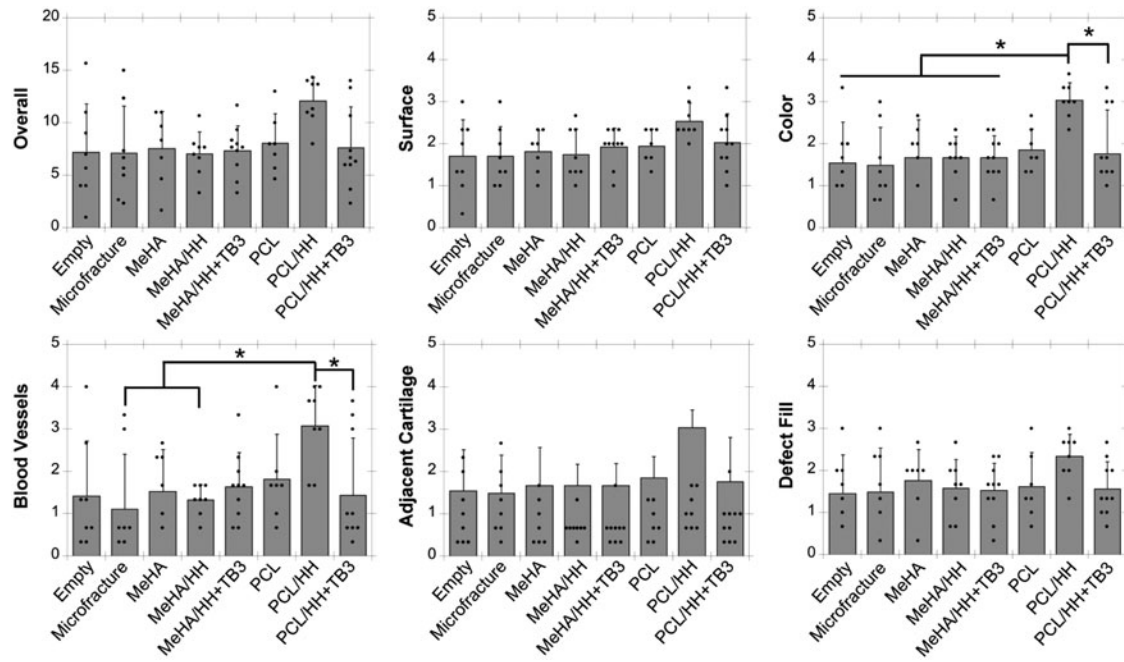

**SUPPLEMENTARY FIG. S6.** Scoring of gross appearance of cartilage defects after 12 weeks *in vivo* using the system developed by Goebel *et al.*<sup>33</sup> ( $n=7-10$ ).  $*p<0.05$ .
