# Supplementary material
Source: PubMed Central journal article supplement (PMC4652183)
Supplement: Supp_Figure7.pdf [file Supp_Figure7.pdf]

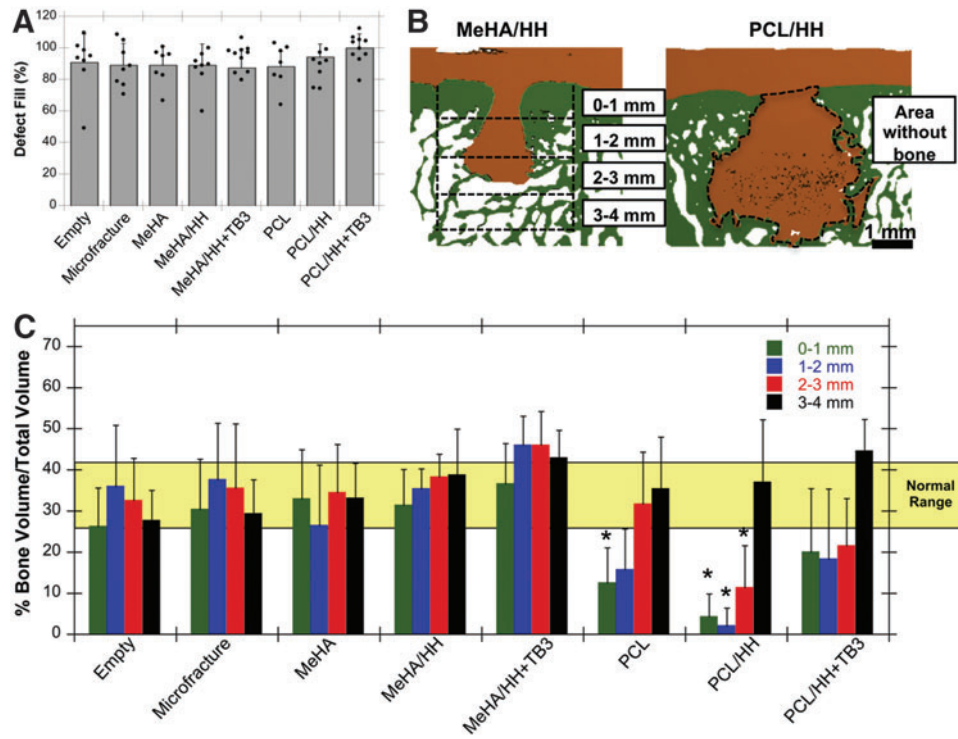

**SUPPLEMENTARY FIG. S7.** Analysis of microCT data with and without the use of contrast enhancement (i.e., Lugol solution) for (A) defect fill and (B, C) subchondral bone remodeling, respectively ( $n = 7-10$ ). In (B), cartilage (orange) and bone (green). In (C), \* denotes significant difference ( $p < 0.05$ ) of specified group from normal range.
