# Supplementary material
Source: PubMed Central journal article supplement (PMC4652183)
Supplement: Supp_Figure8.pdf [file Supp_Figure8.pdf]

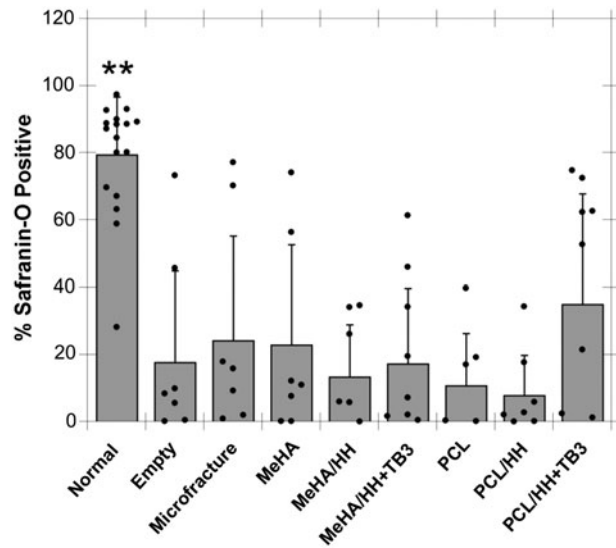

**SUPPLEMENTARY FIG. S8.** Percent Safranin-O-positive stained area (quantified from histology) of cartilage defects after 12 weeks *in vivo* ( $n=7-10$ ).  $**p < 0.05$  compared to all other groups.
