# Supplementary material
Source: PubMed Central journal article supplement (PMC4652183)
Supplement: Supp_Figure9.pdf [file Supp_Figure9.pdf]

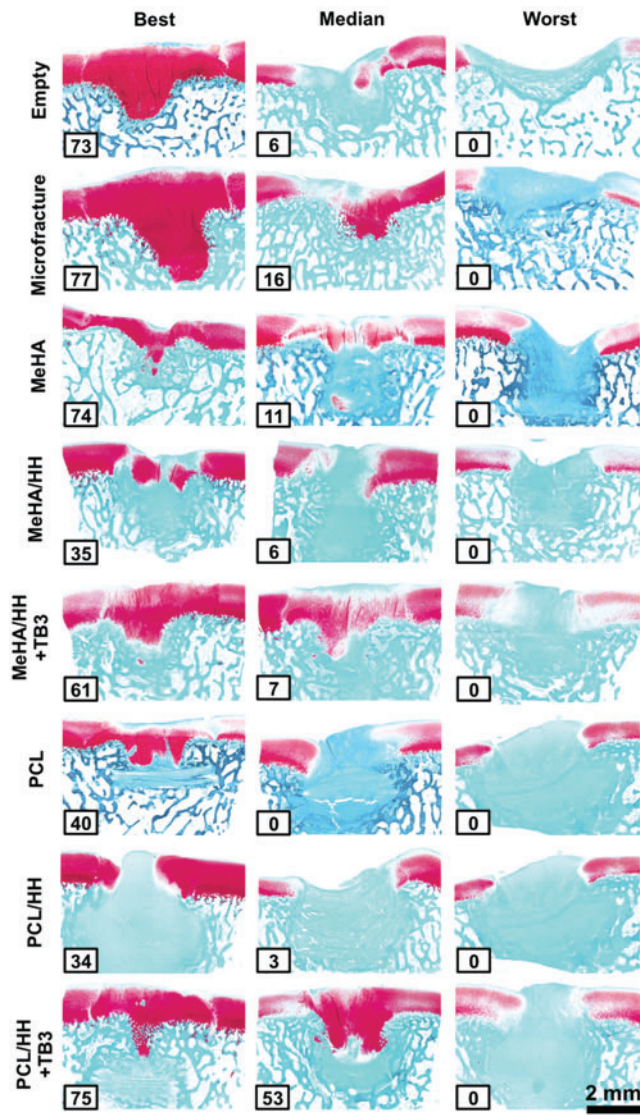

**SUPPLEMENTARY FIG. S9.** Staining with Safranin-O and fast green of cartilage defects after 12 weeks *in vivo*. Images shown represent best, worst, and median in terms of tissue repair as quantified by overall histological score (shown in *insets*) ( $n=7-10$ ).
