# Supplementary material
Source: PubMed Central journal article supplement (PMC4652183)
Supplement: Supp_Figure11.pdf [file Supp_Figure11.pdf]

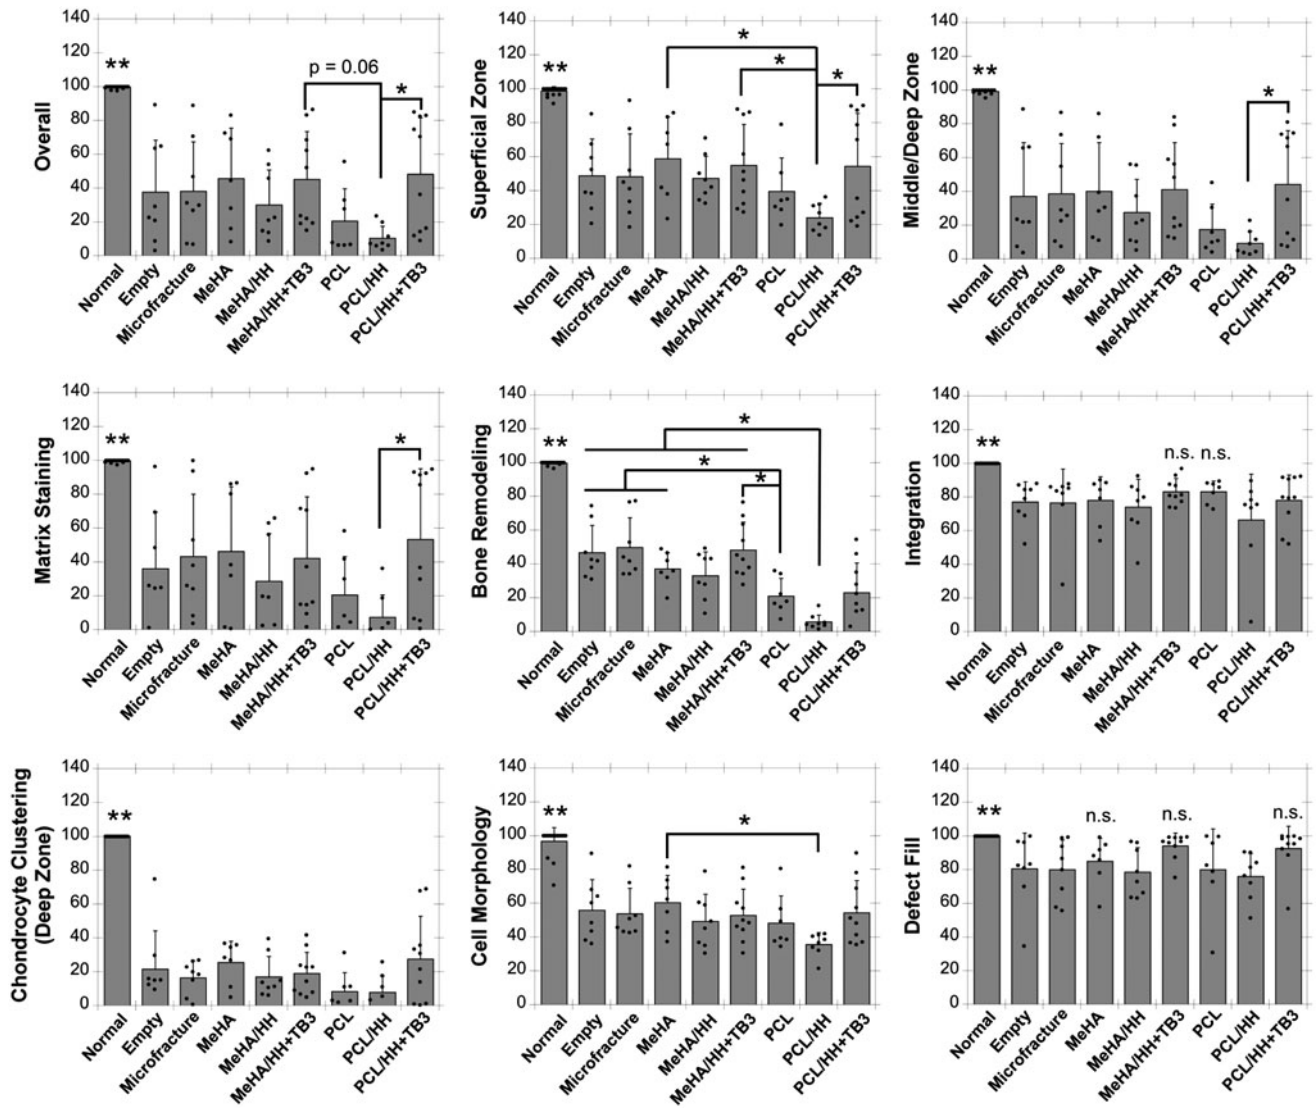

**SUPPLEMENTARY FIG. S11.** Scoring of histology (based on Safranin-O/fast green and H&E staining) using a modified version of the ICRS-II system ( $n = 7-10$ ). \* $p < 0.05$  between specified groups and \*\* $p < 0.05$  compared to all other groups unless specified by n.s.
