# Supplementary material
Source: PubMed Central journal article supplement (PMC4652183)
Supplement: Supp_Figure12.pdf [file Supp_Figure12.pdf]

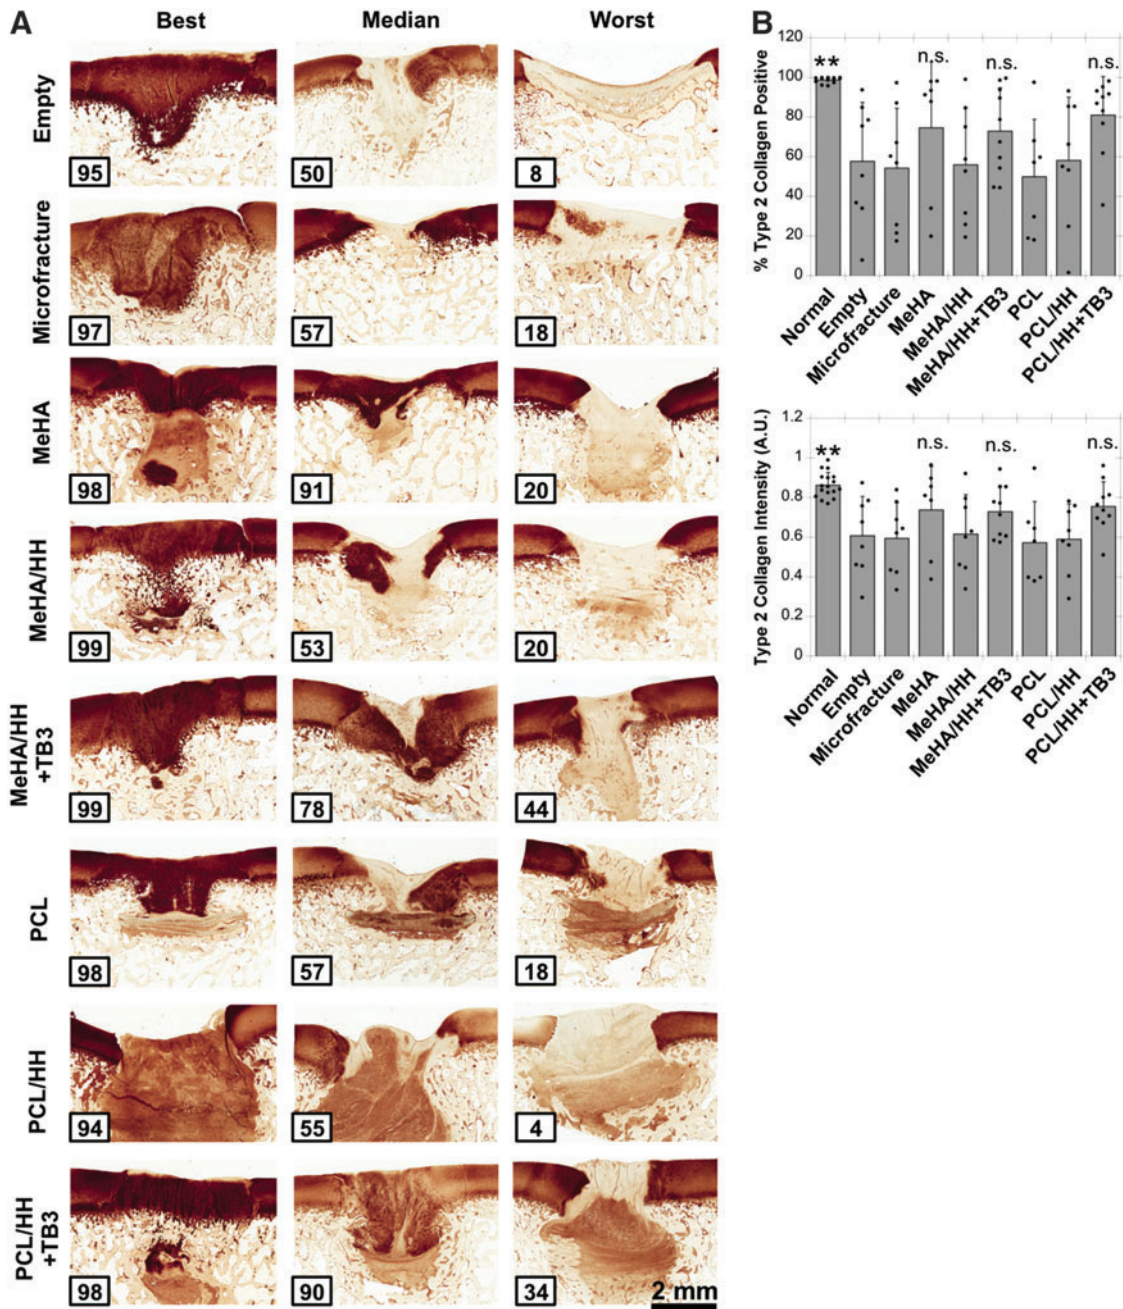

**SUPPLEMENTARY FIG. S12.** Immunohistochemistry for type 2 collagen within cartilage defects after 12 weeks *in vivo*. (A) Images shown represent best, worst, and median in terms of tissue repair as quantified by percent type 2 collagen-positive stained area (shown in *insets*) ( $n=7-10$ ). (B) Quantification of type 2 collagen percent-positive stained area and staining intensity ( $n=7-10$ ).  $**p < 0.05$  compared to all other groups unless specified by n.s.
