# Supplementary material
Source: PubMed Central journal article supplement (PMC4652183)
Supplement: Supp_Figure13.pdf [file Supp_Figure13.pdf]

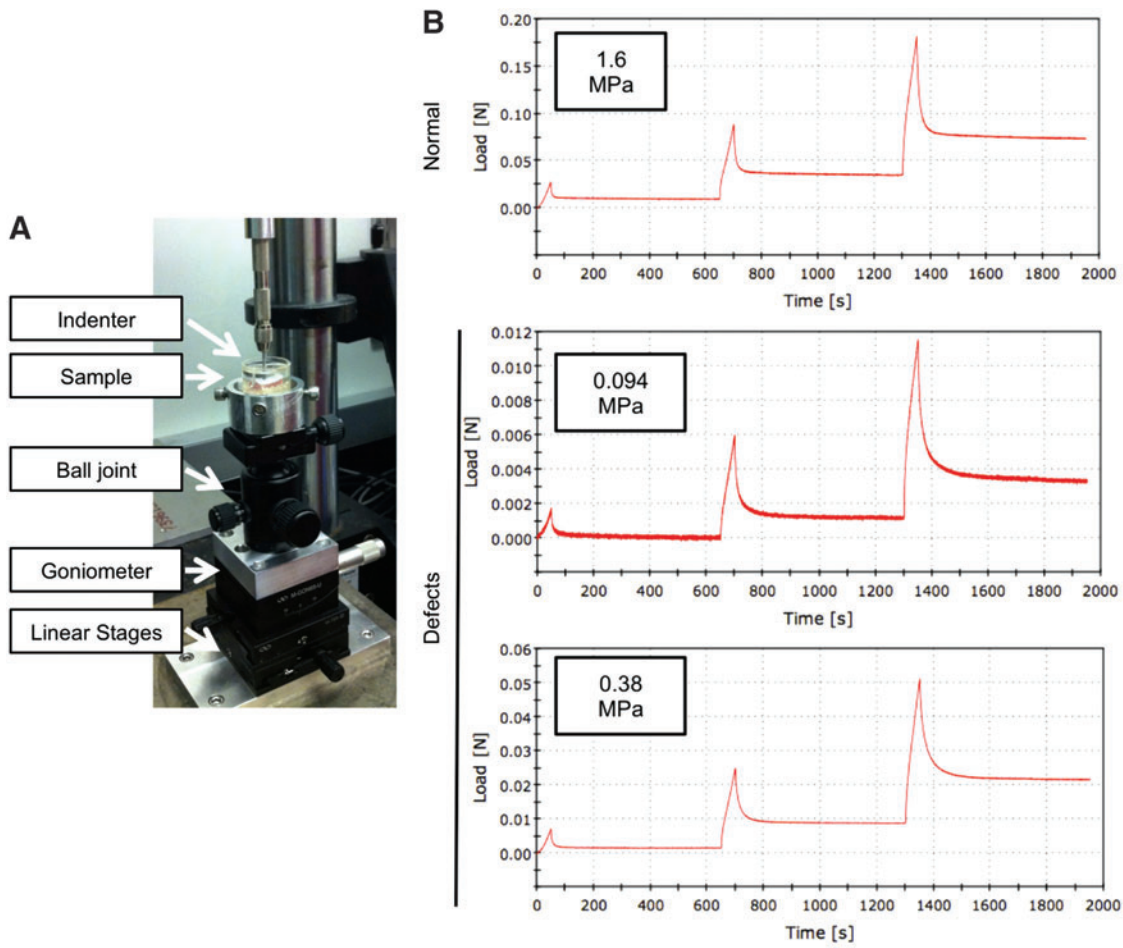

**SUPPLEMENTARY FIG. S13.** Microindentation testing for mechanical properties. **(A)** Custom microindentation setup for alignment of cartilage tissue to spherical indenter. **(B)** Typical stress–relaxation curves obtained through micro-indentation testing for normal tissue and cartilage defects, with the resulting Young’s modulus shown in the *insets*.
