# Supplementary material
Source: PubMed Central journal article supplement (PMC4652183)
Supplement: Supp_Figure14.pdf [file Supp_Figure14.pdf]

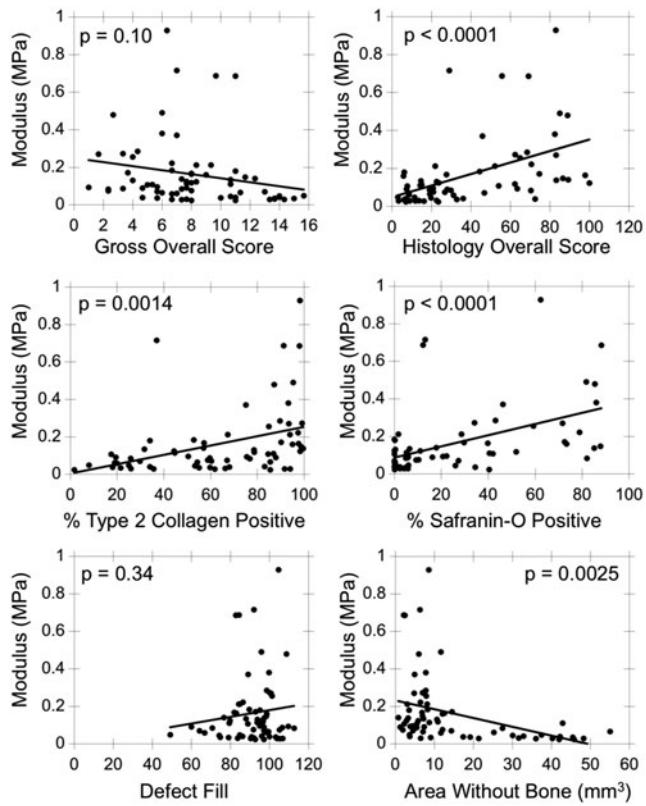

**SUPPLEMENTARY FIG. S14.** Linear relationships between commonly reported outcome measures and mechanical properties, as quantified through statistical analysis.
